# Supplementary material for: Tin-based materials supported on nitrogen-doped reduced graphene oxide towards their application in lithium-ion batteries
Source: Royal Society of Chemistry journal article supplement (doi:10.1039/c7ra10731e), 2017-01-01
Supplement: c7ra10731e1.pdf [file c7ra10731e1.pdf]

## Supporting Information

# Tin-based Materials Supported on Nitrogen Doped Reduced Graphene Oxide towards their Application on Lithium Ion Battery

Xiaoxia Zuo<sup>a</sup>, Bao Li<sup>a</sup>, Kun Chang<sup>b,\*</sup>, Hongwei Tang<sup>a</sup>, Zhaorong Chang<sup>a,\*</sup>

*<sup>a</sup>Collaborative Innovation Center of Henan Province for Green Manufacturing of Fine Chemicals, School of Chemistry and Chemical Engineering, Henan Normal University, Xixiang 453007, PR China.*

*<sup>b</sup>National Institute for Materials Science (NIMS), 1-1 Namiki, Tsukuba, Ibaraki, 305-0044, Japan.*

### Corresponding Author

\*E-mail: [chang.kun@nims.go.jp](mailto:chang.kun@nims.go.jp).

\*E-mail: [czr\\_56@163.com](mailto:czr_56@163.com).

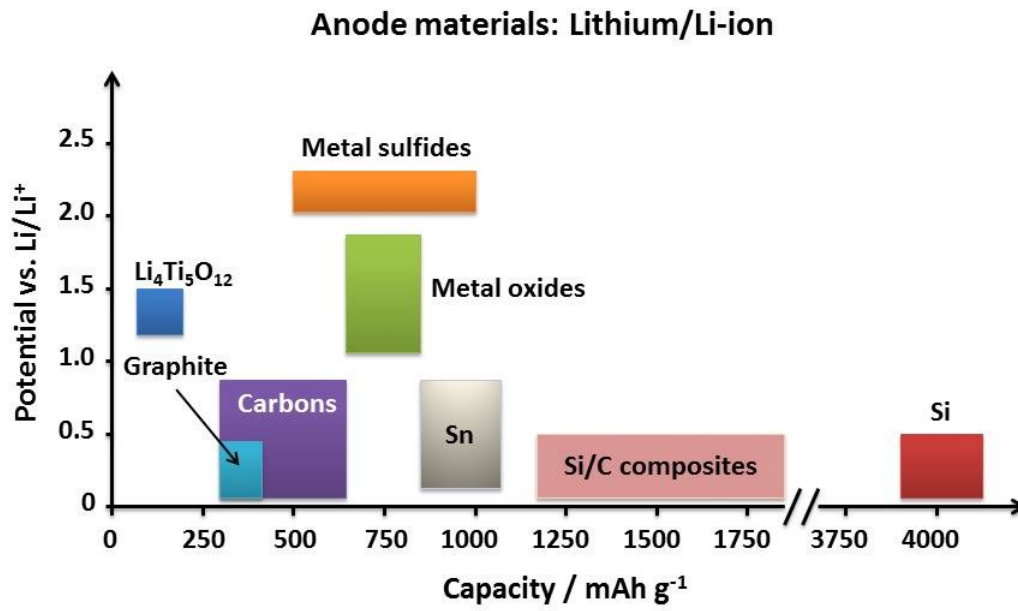

**Fig. S1.** Schematic illustration of capacity and potential distribution for normal anode materials.

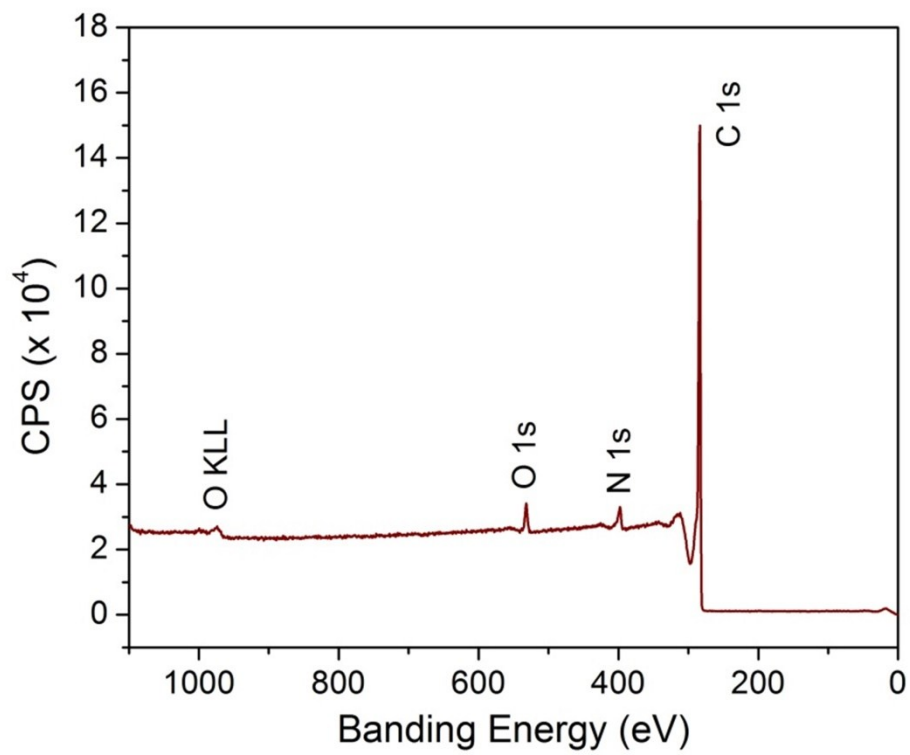

**Fig. S2.** XPS survey of N-doped rGO.

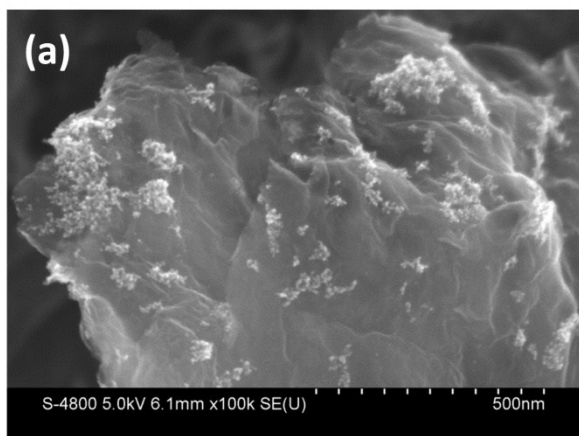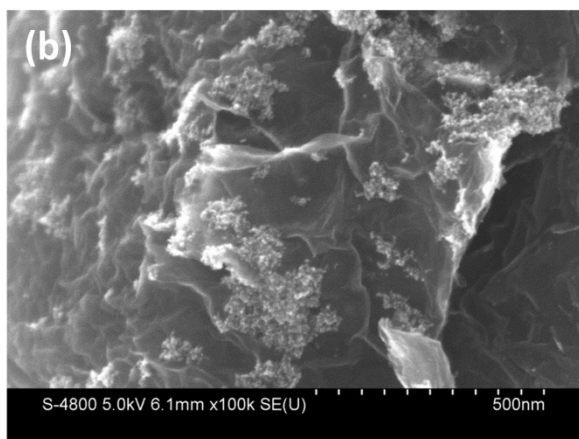

**Fig. S3.** (a) (b) SEM images of SnO<sub>2</sub>/rGO composite. It can be seen that the SnO<sub>2</sub> nanoparticles cannot be uniformly dispersed on the surface of graphene.

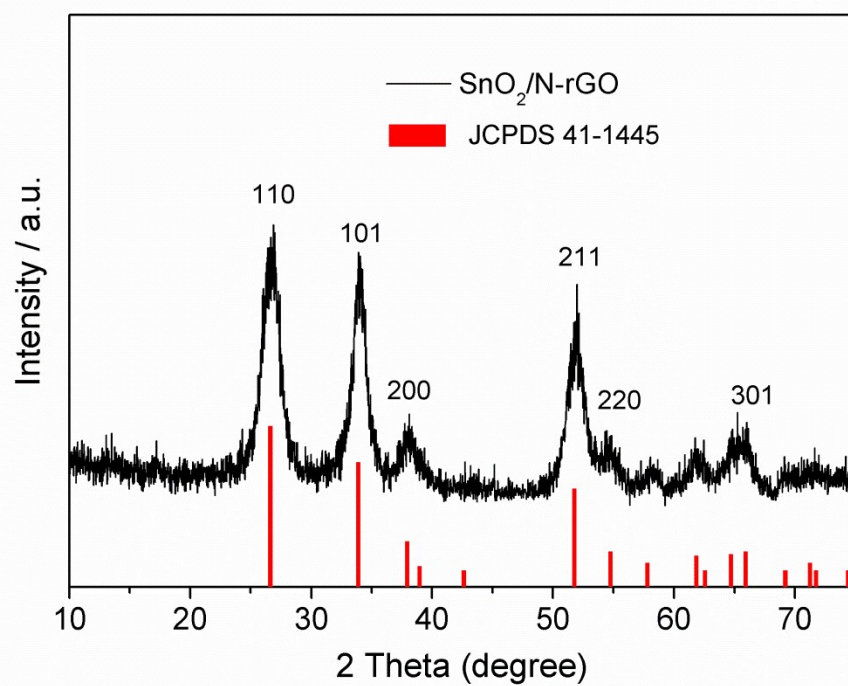

Fig. S4. XRD pattern of SnO<sub>2</sub>/N-rGO composites.

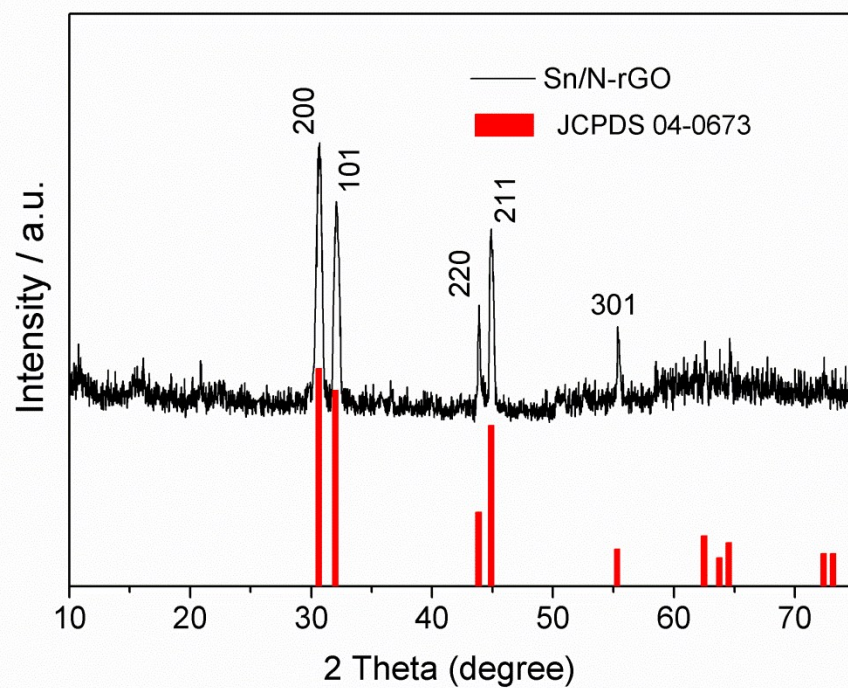

Fig. S5. XRD pattern of Sn/N-rGO composites.

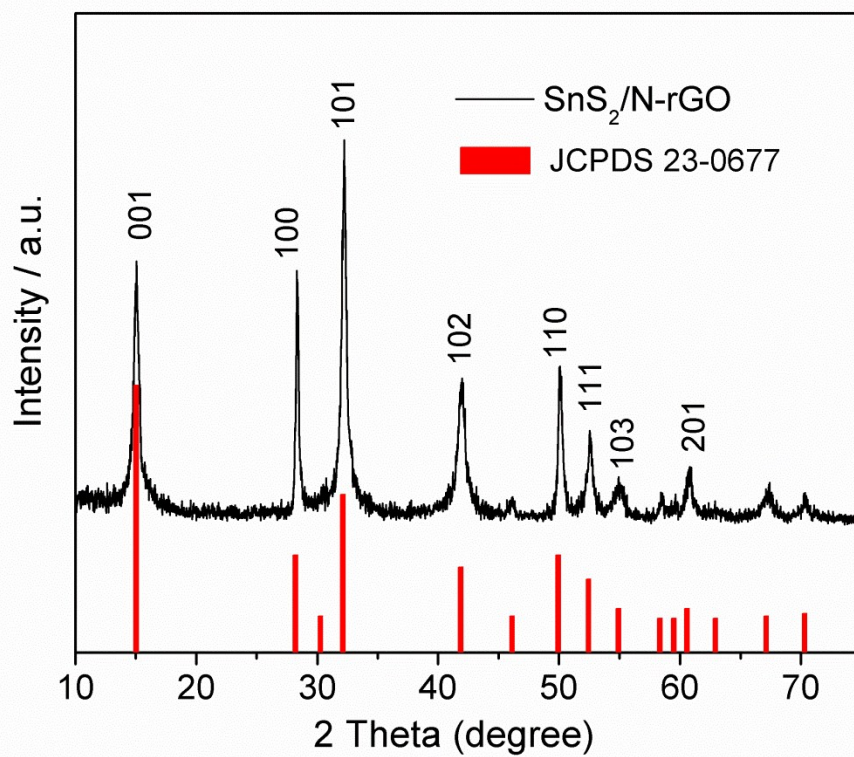

**Fig. S6.** XRD pattern of SnS<sub>2</sub>/N-rGO composites.

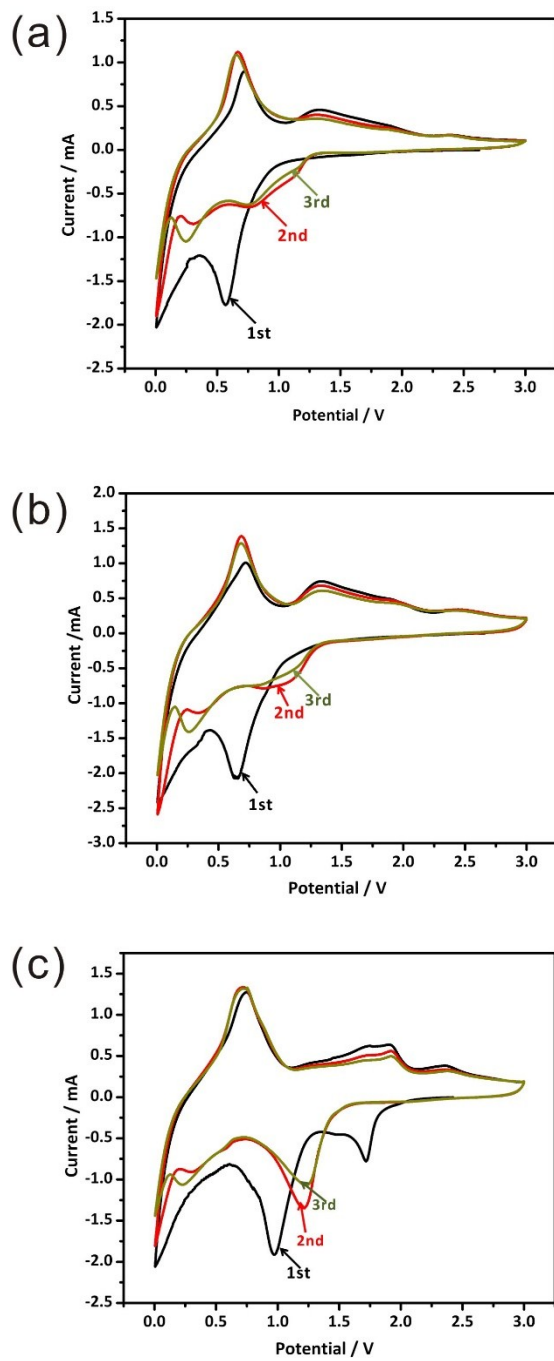

**Fig. S7.** Cyclic voltammograms curves of Sn-based composites: (a) Sn/N-rGO, (b) SnO<sub>2</sub>/N-rGO, and (c) SnS<sub>2</sub>/N-rGO.

Table S1. Element Composition of Sn-based N-rGO composites.

| Composite               | Element | Weight% | Atomic% |
|-------------------------|---------|---------|---------|
| Sn/N-rGO                | C (K)   | 3.55    | 14.64   |
|                         | O (K)   | 8.88    | 32.20   |
|                         | Sn (L)  | 87.56   | 53.16   |
| SnO <sub>2</sub> /N-rGO | C (K)   | 1.79    | 7.19    |
|                         | O (K)   | 20.36   | 61.25   |
|                         | Sn (L)  | 77.84   | 31.56   |
| SnS <sub>2</sub> /N-rGO | C (K)   | 0.46    | 2.54    |
|                         | S (K)   | 27.16   | 66.66   |
|                         | Sn (L)  | 72.39   | 30.80   |
